# Supplementary material for: Does breast carcinoma belong to the Lynch syndrome tumor spectrum? – Somatic mutational profiles vs. ovarian and colorectal carcinomas
Source: PubMed Central journal article supplement (PMC7147090; doi:10.18632/oncotarget.27538), 2020-04-07
Supplement: oncotarget-11-1244-s001.pdf [file oncotarget-11-1244-s001.pdf]

## Does breast carcinoma belong to the Lynch syndrome tumor spectrum? – Somatic mutational profiles vs. ovarian and colorectal carcinomas

### SUPPLEMENTARY MATERIALS

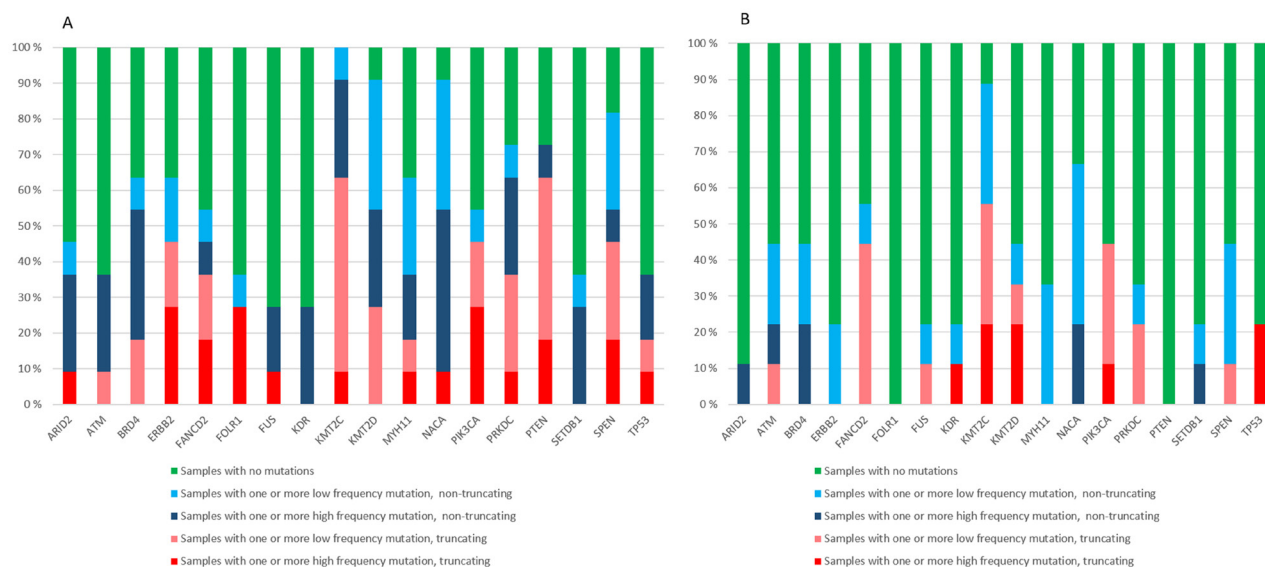

**Supplementary Figure 1: Top mutated genes in LS breast cancer: truncating vs. non-truncating.** Breakdown of dMMR LS-BC (A) and pMMR LS-BC (B) into five categories according to somatic mutational status of each top mutant gene specified on the x-axis. The 18 top mutant genes are those identified for dMMR LS-BC by a strategy described in Results (main paper). Somatic mutations were classified primarily by frequency (high- vs. low-frequency mutations, with variant allele frequency 0.25 as a divider) and secondarily by predicted consequence (truncating vs. non-truncating).

**Supplementary Table 1: Second hit analysis of the predisposing MMR genes: somatic point mutations in LS-BCs stratified by LOH.** See Supplementary Table 1

**Supplementary Table 2: Somatic MMR gene mutations in breast carcinomas from proven non-carriers.** See Supplementary Table 2

**Supplementary Table 3: Distributions of CCP genes according to their tendency to acquire high-frequency mutations (mutant alle frequency  $\geq 25\%$ ).** See Supplementary Table 3

**Supplementary Table 4: Specification of all somatic mutations in the top 18 genes in LS dMMR breast carcinomas.** See Supplementary Table 4

**Supplementary Table 5: Performance characteristics for breast carcinomas and paired normal samples.** See Supplementary Table 5
